# Supplementary material
Source: PubMed Central journal article supplement (PMC4145129)
Supplement: supp_tpc.114.126946_tpc126946_Supplemental.pdf [file supp_tpc.114.126946_tpc126946_Supplemental.pdf]

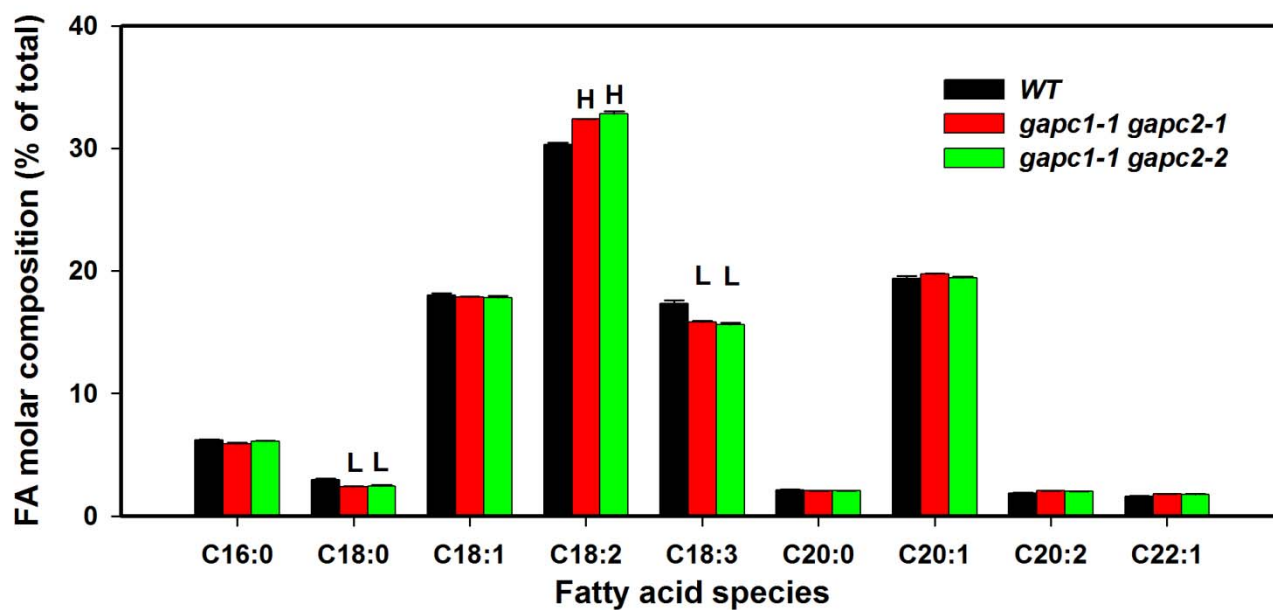

**Supplemental Figure 1.** Fatty acid composition of *GAPC* double knockouts compared to WT. Fatty acid composition was calculated as mol%. Values are means  $\pm$  SD ( $n = 3$ ). H and L indicate significantly higher and lower than WT (Student's *t*-test,  $P < 0.05$ ).

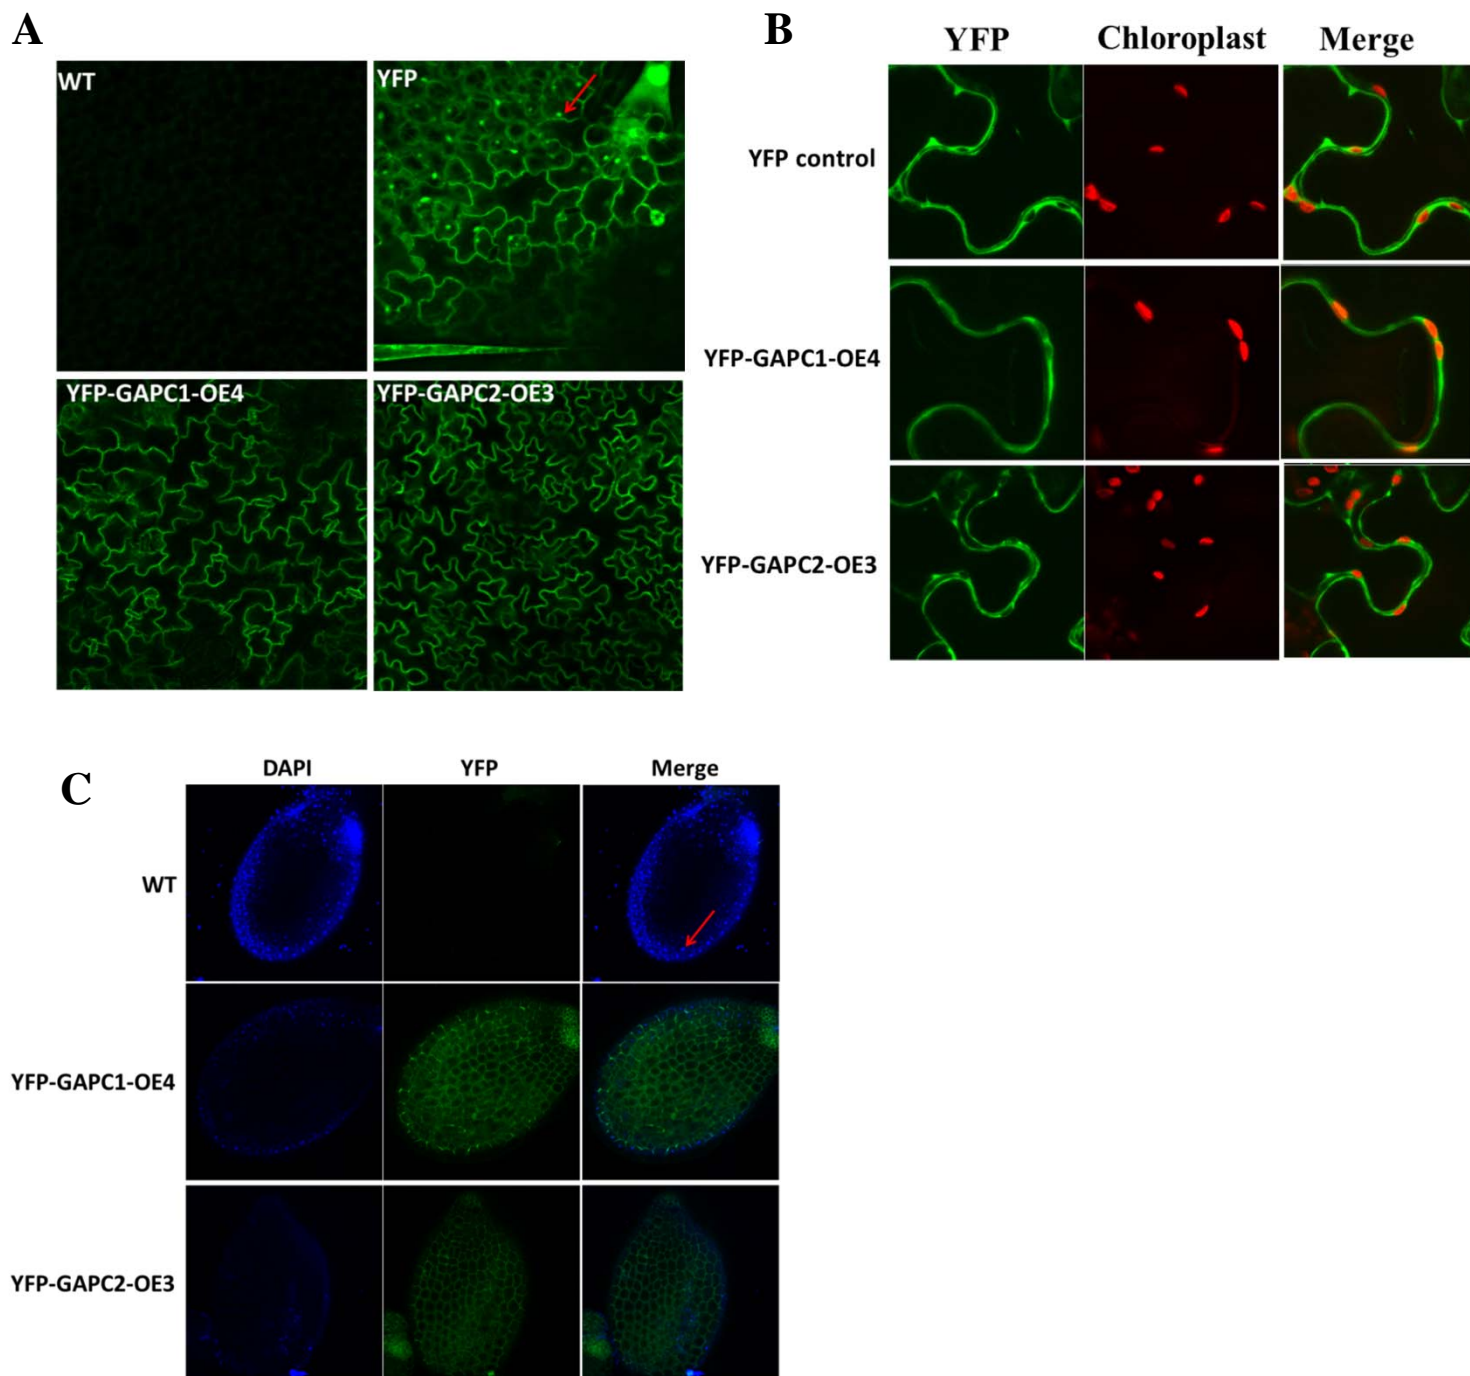

**Supplemental Figure 2.** Subcellular localization of *GAPC*.

**(A)** Expression of YFP-GAPC in Arabidopsis leaves. YFP-GAPC1 and YFP-GAPC2 were highly expressed in leaves. YFP was used as control and indicated nucleus localization in some cells while YFP-GAPCs did not have significant nucleus accumulation (indicated by red arrow). Green color represents YFP fluorescence.

**(B)** YFP-GAPC1 and YFP-GAPC2 both mainly localized in cytosol in leaves. Green color represents YFP fluorescence and red color marks chloroplasts as a reference.

**(C)** Expression of YFP-GAPC1 and YFP-GAPC2 in developing seeds (4 DAF). Seeds were stained by 4',6-diamidino-2-phenylindole (DAPI, blue) to show nucleus (indicated by red arrow).

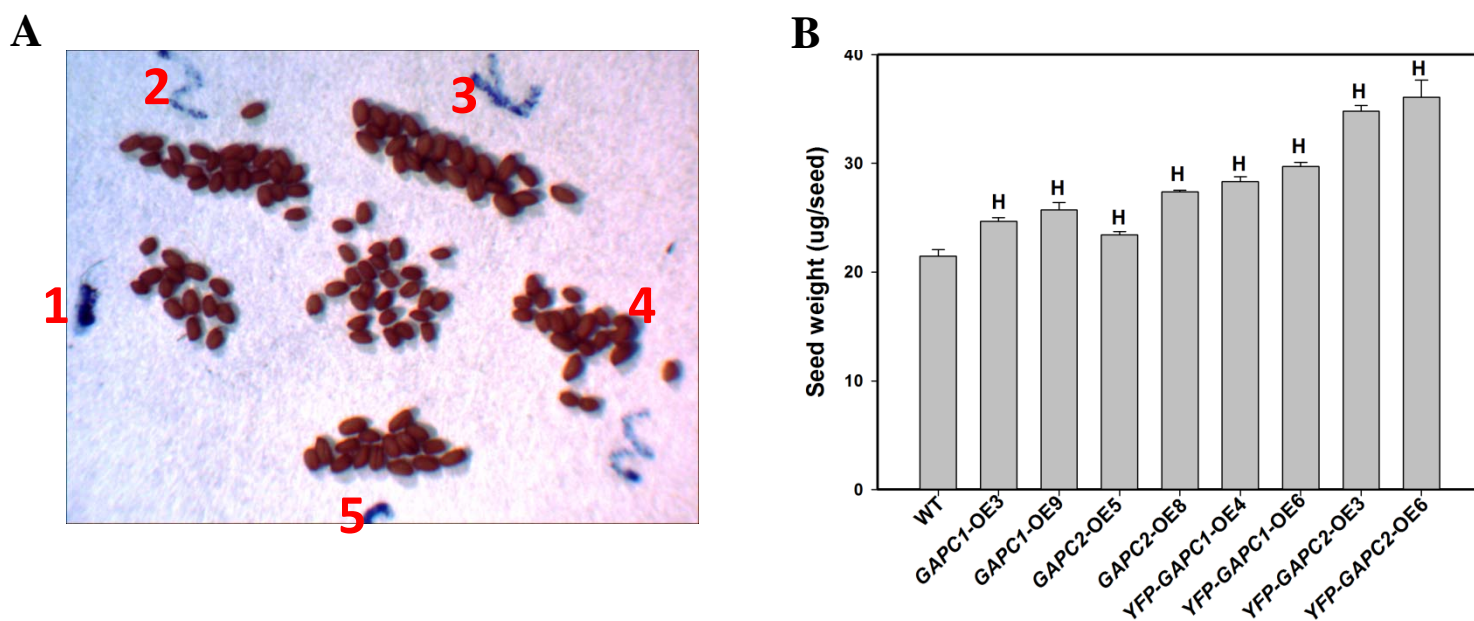

**Supplemental Figure 3.** Overexpression (OE) of *GAPCs* under the control of 35S promoter resulted in bigger and heavier seeds.

**(A)** Photo of seeds was taken under microscope. WT seeds are in the middle. 1, *YFP-GAPC1-OE4*; 2, *YFP-GAPC2-OE6*; 3, *YFP-GAPC2-OE2*; 4, *YFP-GAPC2-OE3*; 5, *YFP-GAPC2-OE6*.

**(B)** Seed weight of WT and 35S promoter-driven *GAPC* OE seeds. Seed weight was average weight based on calculation of the total weight (~3 mg) and total number of seeds. Values are means  $\pm$  SD (n = 3). H indicates significantly higher than WT (student *t*-test, P < 0.05).

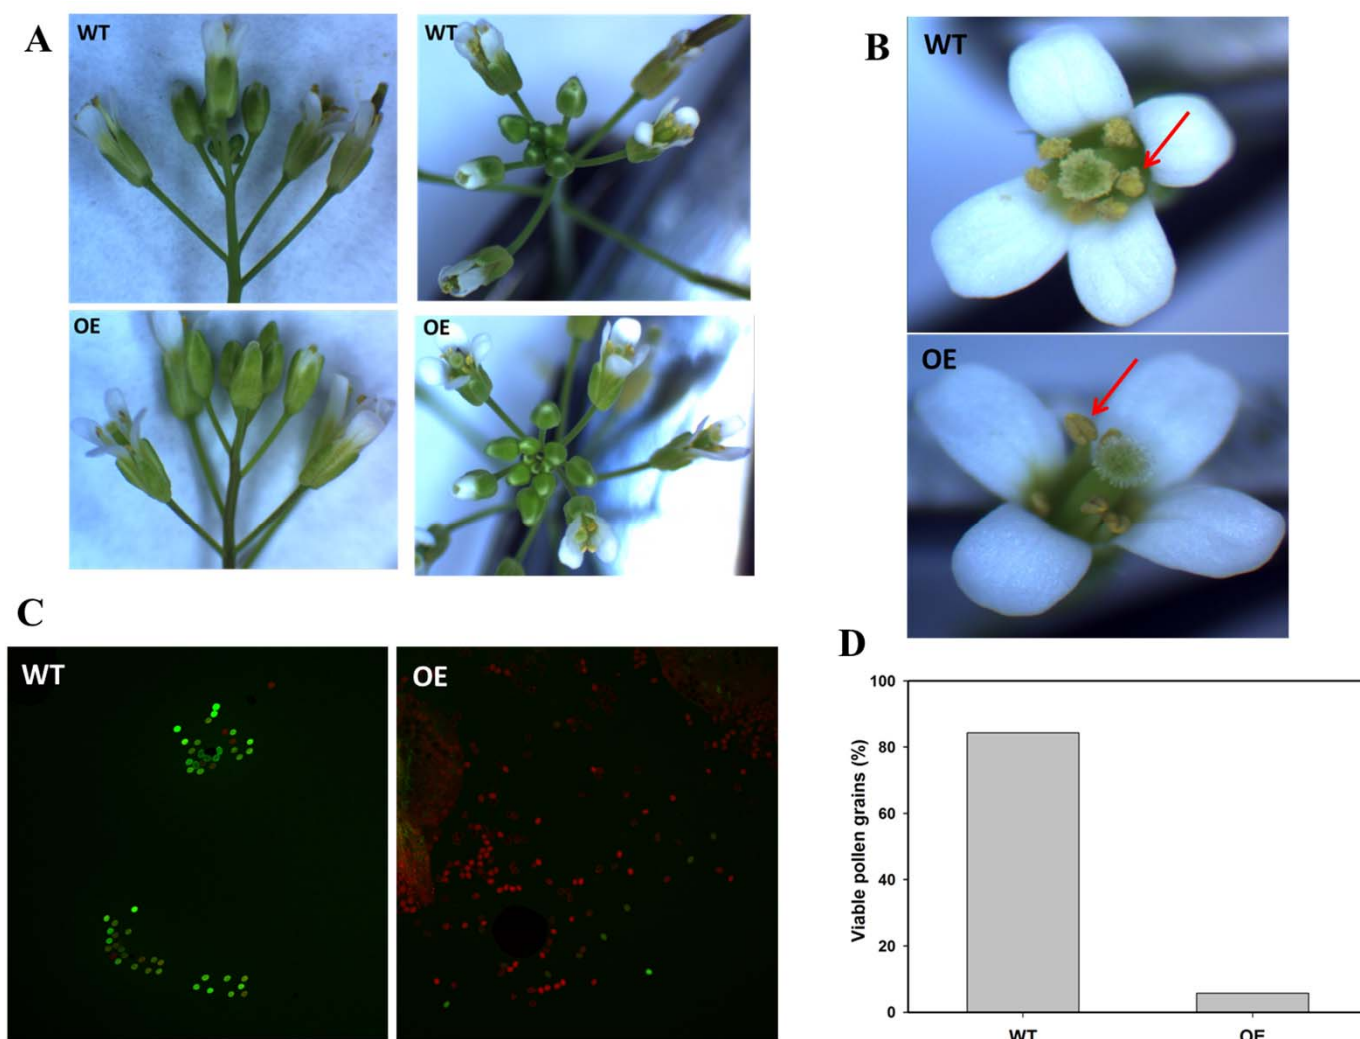

**Supplemental Figure 4.** OE of *GAPCs* under the control of 35S promoter causes male sterility.

**(A)** Morphology of WT and OE flowers under microscope.

**(B)** Flowers of WT and OE under microscope. Pollen could be observed on the WT anther after dehiscence (2 days after flowering). Anther of OE did not dehiscence and no pollen were on the anther after flowering.

**(C)** Pollen viability staining by fluorescein diacetate (green) and propidium iodide (red). Green indicated viable pollen and red indicated dead pollen. Pollen from OE flower was obtained by manually disruption of the anther locules.

**(D)** Percentage of viable pollen in WT and OE.

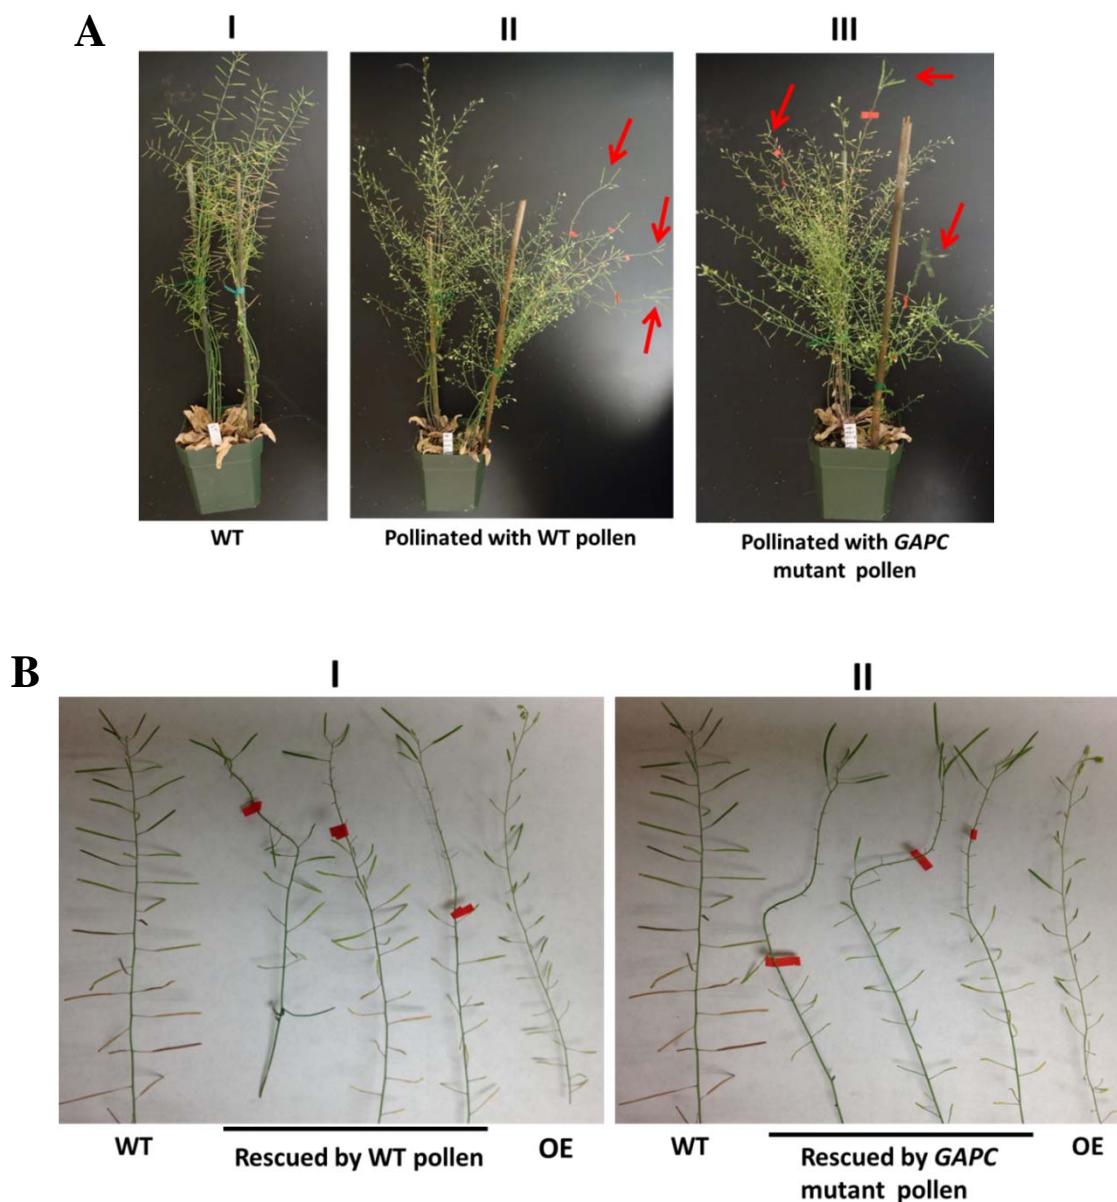

**Supplemental Figure 5.** Both WT and *gapc1-1 gapc2-1* pollen rescued silique development of 35S promoter-driven OE plants.

**(A)** Fertilize stigma of OE flower (anther removed before opening) with WT pollen or *gapc1-1 gapc2-1* pollen rescued silique development of OE plants. I, WT; II, *YFP-GAPC2* OE, red arrow indicates formation of normal siliques after flower pollinated with WT pollen; III, *YFP-GAPC2* OE, red arrow indicates formation of normal siliques after flower pollinated with *gapc1-1 gapc2-1* pollen.

**(B)** Comparison of siliques between WT, rescued OE and *YFP-GAPC2* OE. In I and II, only the top 3 siliques on each stem were normally formed because of fertilization by WT or *gapc1-1 gapc2-1* pollen, indicates the pollen of OE plants can't fertilize the stigma.



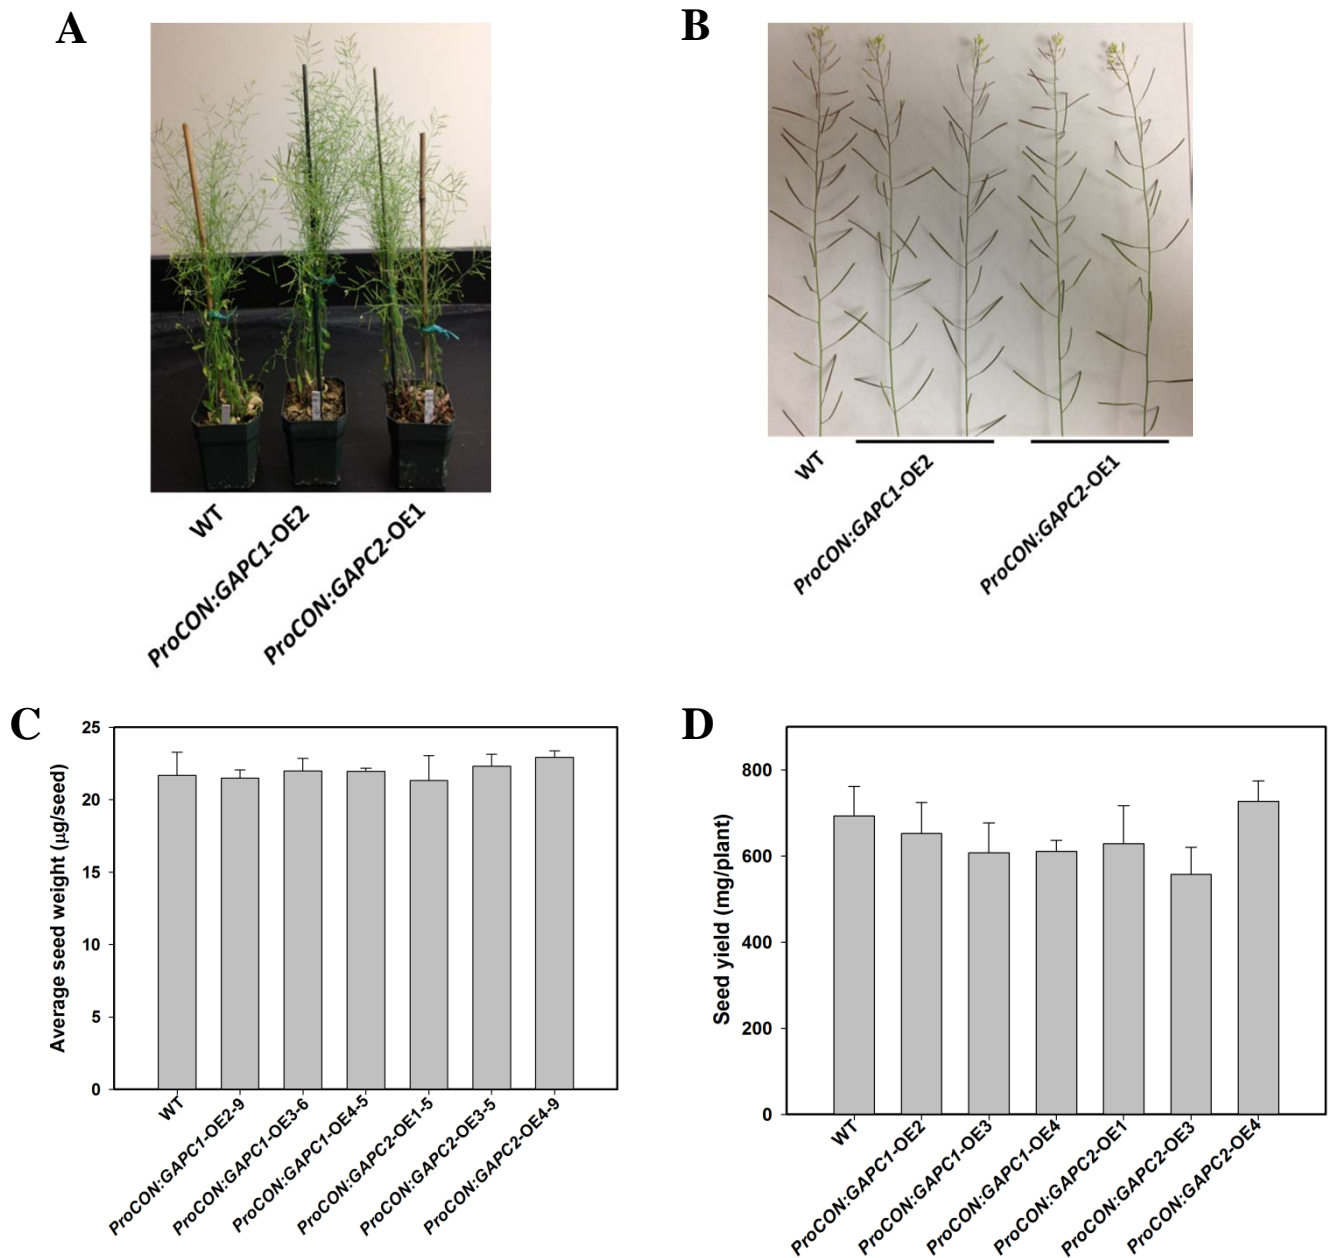

**Supplemental Figure 6.** Siliques develop normally on plants of seed-specific OE of *GAPC*.

(A) Plants were 7 weeks old growing under 16 h light/ 8 h night.

(B) Silique development of *GAPC* seed-specific OE plants was as normal as WT.

(C) Seed weight of WT and seed-specific OE seeds. Seed weight was average weight based on calculation of the total weight (~3 mg) and total number of seeds. Values are means  $\pm$  SD ( $n = 3$ ).

(D) Seed yield per plant of WT and OE plants. Values are means  $\pm$  SE ( $n = 8$ ).

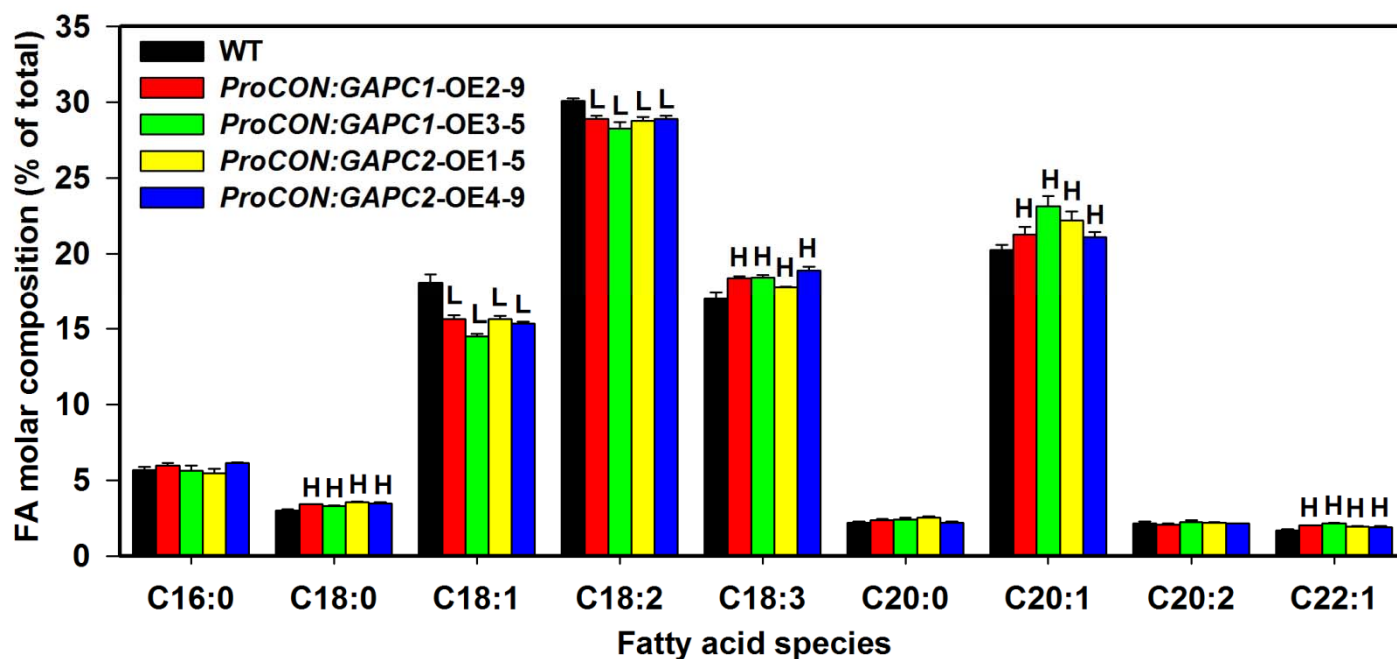

**Supplemental Figure 7.** Seed-specific OE of GAPCs alters fatty acid composition in the seeds. Fatty acid composition was calculated as mol%. Values are means  $\pm$  SD ( $n = 3$ ). H and L indicate significantly higher and lower than WT (Student's  $t$ -test,  $P < 0.05$ ).

**Supplemental Table 1.** Metabolites involved in the pentose phosphate pathway and starch biosynthesis pathway

| Metabolite                | WT                          | <i>gapc1-1gapc2-1</i>       | GAPC1-OE#2                    | GAPC2-OE#1                  |
|---------------------------|-----------------------------|-----------------------------|-------------------------------|-----------------------------|
| Ribose-5-phosphate        | 13.77 ± 1.05 <sup>a</sup>   | 13.63 ± 0.63 <sup>a</sup>   | 10.89 ± 1.23 <sup>a,b</sup>   | 10.94 ± 0.89 <sup>b</sup>   |
| Ribulose-5-phosphate      | 9.91 ± 1.24 <sup>a</sup>    | 10.49 ± 0.90 <sup>a</sup>   | 6.98 ± 1.09 <sup>a</sup>      | 7.52 ± 1.01 <sup>a</sup>    |
| Xylulose-5-phosphate      | 22.95 ± 0.89 <sup>a</sup>   | 24.67 ± 1.82 <sup>a</sup>   | 18.48 ± 2.32 <sup>a</sup>     | 20.71 ± 2.94 <sup>a</sup>   |
| Sedoheptulose-7-phosphate | 80.4 ± 6.37 <sup>a</sup>    | 57.13 ± 9.17 <sup>b</sup>   | 65.54 ± 6.57 <sup>a,b</sup>   | 71.80 ± 6.87 <sup>a,b</sup> |
| Ribulose-1,5-bisphosphate | 17.67 ± 2.22 <sup>a</sup>   | 12.11 ± 1.21 <sup>b</sup>   | 10.28 ± 1.66 <sup>b,c</sup>   | 7.64 ± 0.71 <sup>c</sup>    |
| UDP                       | 14.68 ± 1.65 <sup>a,b</sup> | 11.46 ± 0.53 <sup>b</sup>   | 16.49 ± 1.56 <sup>a</sup>     | 18.10 ± 0.79 <sup>a</sup>   |
| UDP-glucose               | 506.88 ± 15.07 <sup>b</sup> | 415.98 ± 10.29 <sup>c</sup> | 567.17 ± 56.69 <sup>a,b</sup> | 673.87 ± 64.97 <sup>a</sup> |

Values are means ± SE (n = 4). One-way ANOVA was performed and different lower case letters mark significant difference between means (P < 0.05).



**Supplemental Table 2. Primer list**

| Purpose       | Gene   | ID        | Primer name    | Sequence                                                      |
|---------------|--------|-----------|----------------|---------------------------------------------------------------|
| Gene cloning  | GAPC1  | At3g04120 | GAPC1-F        | GCGTTAATTAACATGGCTGACAAGAAGATTAGG                             |
|               |        |           | GAPC1-R        | GCG GTCGACTTAGGCCTTTGACATGTGGACGAT                            |
| Gene cloning  | GAPC2  | At1g13440 | GAPC2-F        | GCGTTAATTAACATGGCTGACAAGAAGATCAGA                             |
|               |        |           | GAPC2-R        | GCG GTCGACTTAGGCCTTTGACATGTGA                                 |
| Gene cloning  | GAPC1  | At3g04120 | ConGAPC1-F     | GCGCGGCCCGCACCATGGCTGACAAGAAGATTAGG                           |
|               |        |           | ConGAPC1-R     | GCGCGGCCCGCTTATTTGTCGTCGTCGTCCTTGTAGTCCATGGCCTT               |
| Gene cloning  | GAPC2  | At1g13440 | BetaConGAPC2-F | GCGCGGCCCGCACCATGGCTGACAAGAAGATCAGA                           |
|               |        |           | BetaConGAPC2-R | GCGCGGCCCGCTTATTTGTCGTCGTCGTCCTTGTAGTCCATGGCCTT<br>TGACATGTGA |
| Real-time PCR | LPAAT1 | At4g30580 | AT1G15080.1_F  | TGGTCAAAGAGGGACACAAGAGC                                       |
|               |        |           | AT1G15080.1_R  | TCCTAGACCAGCAAACGACCAAG                                       |
| Real-time PCR | LPAAT2 | At3g57650 | AT3G57650.1_F  | TCAAAGGACAACCTTCAGTGGTG                                       |
|               |        |           | AT3G57650.1_R  | ACCACTGTGCAATTGCGTCATC                                        |
| Real-time PCR | LPAAT3 | At1g51260 | AT1G51260.1_F  | GGCTCATCGTCAACATCATTACAGC                                     |
|               |        |           | AT1G51260.1_R  | CAAGCCCACCAATCAAAACAACC                                       |
| Real-time PCR | LPAAT4 | At1g75020 | AT1G75020.1_F  | TCCCTGAAGGAACCGATTTCACTG                                      |
|               |        |           | AT1G75020.1_R  | ACGTTTGATAGTGCTGGAAGACC                                       |
| Real-time PCR | LPAAT5 | At3g18850 | AT3G18850.1_F  | AGGAGATGGGAAGTCGATGAAGC                                       |
|               |        |           | AT3G18850.1_R  | TCCTTTGGCATTIAGCCTCTGTG                                       |
| Real-time PCR | LPP1   | At2g01180 | AT2G01180.1_F  | ATTCTGGCGCAATTCTCAGGAC                                        |
|               |        |           | AT2G01180.1_R  | CGTGCTTGTGTTTAGAAGCGACTC                                      |
| Real-time PCR | LPP2   | At1g15080 | AT4G30580.1_F  | GGTCGCATTTCTAATGGCATGACG                                      |
|               |        |           | AT4G30580.1_R  | TCACTCGGGACAGCATGAAGG                                         |
| Real-time PCR | LPP3   | At3g02600 | AT3G02600.1_F  | TTCCAAGTGGACACACGTCATGG                                       |
|               |        |           | AT3G02600.1_R  | GCTTTGCAACGTGGCCTTTACC                                        |
| Real-time PCR | DGAT1  | At2g19450 | AT2G19450.1_F  | TCGCTCCACATTGTGTTATCAGC                                       |
|               |        |           | AT2G19450.1_R  | AAATTGACGAGCCACCCAACCC                                        |
| Real-time PCR | DGAT2  | At3g51520 | AT3G51520.1_F  | TCCAGCCTAATCGTGCCTATGTC                                       |
|               |        |           | AT3G51520.1_R  | AGCAACAACCTCCAATCGGTAGCAC                                     |
| Real-time PCR | PDAT1  | At5g13640 | AT5G13640.1_F  | AAAGGATGTTGCAGTTGCCAGAG                                       |
|               |        |           | AT5G13640.1_R  | TGTTGAGTCCCATGTGCGTGTC                                        |
| Real-time PCR | PDAT2  | At3g44830 | AT3G44830.1_F  | AGATGATGAGACGAGCCGAAGC                                        |
|               |        |           | AT3G44830.1_R  | TCTCTGGTGCCTCCGGTAATTTG                                       |
| Real-time PCR | CCT1   | At2g32260 | AT2G32260.1_F  | AGGAGTTTCTTGACAAGCACCAG                                       |
|               |        |           | AT2G32260.1_R  | AGCTCCGCTTGAATCAGCATAGG                                       |
| Real-time PCR | CCT2   | At4g15130 | AT4G15130.1_F  | TCCAGATGCACCATGGTTCTTAC                                       |
|               |        |           | AT4G15130.1_R  | AGCTCCACTAGTATCCGCATAGGG                                      |
| Real-time PCR | AAPT1  | At1g13560 | AT1G13560.1_F  | AGTTGGGTGCCATTTGTGAATGAG                                      |
|               |        |           | AT1G13560.1_R  | TGCTCCCGTTTCTTGATCGAACG                                       |
| Real-time PCR | AAPT2  | At3g25585 | AT3G25585.1_F  | TCCTCTGCTGATTCTTCGCTGAC                                       |
|               |        |           | AT3G25585.1_R  | TGGGTCTCTCTCAAATCAACGAC                                       |
| Real-time PCR | UBQ10  | At4g05320 | AT4G05320.1_F  | CACACTCCACTTGGTCTTGCCT                                        |
|               |        |           | AT4G05320.1_R  | TGGTCTTCCGGTGAGACTCTTCA                                       |
